# Supplementary material for: Probiotics use for antibiotic-associated diarrhea: a pragmatic participatory evaluation in nursing homes
Source: BMC Gastroenterol. 2020 May 13;20:151. doi: 10.1186/s12876-020-01297-w (PMC7222499; doi:10.1186/s12876-020-01297-w)
Supplement: Supplementary file 2 — Additional file 2. Raw data of the probiotics evaluation [file 12876_2020_1297_MOESM2_ESM.xlsx]

## Sheet: prOud client gegevens compleet 
Clientcode_new	Locatie (1=Alblashof en Waalburcht, 2=Waerthove)	Groeppatientcontrole	Indicatievoorantibiotica	Typeaugmentinciproxin	StartdatumAB	EinddatumAB	Probiotica	StartdatumPB	EinddatumPB	Diarree	Toestemming	Opmerkingenontlasting	Opmerkingenprobioticagebruik	pgsomgp2018	Duur_kuur_AB	Duur_kuur_PB
82	1	1	uwi en lwi	augmentin	2018-02-02	2018-02-09	1	2018-02-02	2018-02-16	1	1			som	7	14
23	1	1	uwi en lwi	augmentin	2018-05-12	2018-05-22	1	2018-05-12	2018-05-29	0	1			pg	10	17
64	1	1	uwi en lwi	ciproxin	2018-05-09	2018-05-23	1	2018-05-09	2018-06-04	0	1		46=47 aug en cipr tegelijk	pg	14	26
64	1	1	uwi en lwi	augmentin	2018-05-14	2018-05-21	1	2018-05-09	2018-06-04	0	1			pg	7	26
18	1	1	uwi	augmentin	2018-03-08	2018-03-15	1	2018-03-08	2018-03-22	1	1			pg	7	14
31	1	1	uwi	ciproxin	2018-03-23	2018-03-30	1	2018-03-23	2018-04-06	1	1			pg	7	14
32	1	1	uwi	ciproxin	2018-06-22	2018-06-25	1	2018-06-22	2018-07-02	1	1			pg	3	10
41	1	1	uwi	ciproxin	2018-01-24	2018-02-07	1	2018-01-24	2018-02-14	1	1			pg	14	21
63	1	1	uwi	ciproxin	2018-03-24	2018-03-31	1	2018-03-24	2018-04-08	1	1			som	7	15
70	1	1	uwi	ciproxin	2018-04-25	2018-05-02	1	2018-04-25	2018-05-09	1	1			pg	7	14
3	1	1	uwi	ciproxin	2018-04-19	2018-04-26	1	2018-04-19	2018-05-03	0	1			pg	7	14
8	1	1	uwi	ciproxin	2018-03-26	2018-04-09	1	2018-03-26	2018-04-16	0	1			pg	14	21
13	1	1	uwi	ciproxin	2018-05-16	2018-05-23	1	2018-05-16	2018-05-30	0	1			pg	7	14
14	1	1	uwi	augmentin	2018-01-09	2018-01-18	1	2018-01-08	2018-01-25	0	1			pg	9	17
15	1	1	uwi	ciproxin	2018-05-25	2018-06-01	1	2018-05-25	2018-06-08	0	1			som	7	14
16	1	1	uwi	ciproxin	2017-12-20	2017-12-27	1	2017-12-20	2018-01-03	0	1			pg	7	14
29	1	1	uwi	ciproxin	2018-04-14	2018-04-28	1	2018-04-14	2018-05-05	0	1			som	14	21
29	1	1	uwi	ciproxin	2018-05-10	2018-05-20	1	2018-05-10	2018-05-27	0	1			som	10	17
36	1	1	uwi	ciproxin	2018-08-20	2018-08-27	1	2018-08-20	2018-09-03	0	1			pg	7	14
37	1	1	uwi	augmentin	2018-06-27	2018-07-04	1	2018-06-27	2018-07-11	0	1			pg	7	14
44	1	1	uwi	ciproxin	2018-05-12	2018-05-26	1	2018-05-12	2018-06-02	0	1			pg	14	21
45	1	1	uwi	ciproxin	2018-01-09	2018-01-16	1	2018-01-09	2018-01-23	0	1			pg	7	14
48	1	1	uwi	ciproxin	2018-04-23	2018-04-30	1	2018-04-23	2018-05-07	0	1			pg	7	14
60	1	1	uwi	ciproxin	2018-03-08	2018-03-15	1	2018-03-08	2018-03-22	0	1			som	7	14
61	1	1	uwi	ciproxin	2018-06-03	2018-06-10	1	2018-06-03	2018-06-17	0	1			pg	7	14
71	1	1	uwi	ciproxin	2018-03-15	2018-03-22	1	2018-03-15	2018-03-29	0	1			pg	7	14
80	1	1	uwi	ciproxin	2018-04-17	2018-04-27	1	2018-04-25	2018-05-09	0	1		cipr/aug tegelijkertijd	pg	10	14
92	1	1	uwi	ciproxin	2018-01-31	2018-02-10	1	2018-01-31	2018-02-17	0	1			som	10	17
93	1	1	uwi	ciproxin	2018-02-09	2018-02-16	1	2018-02-09	2018-02-23	0	1			som	7	14
93	1	1	uwi	ciproxin	2018-03-22	2018-03-29	1	2018-03-28	2018-04-05	0	1			som	7	8
93	1	1	uwi	ciproxin	2018-02-09	2018-02-16	1	2018-02-09	2018-02-23	0	1			som	7	14
50	2	1	UWI	ciproxin	2018-05-09	2018-05-16	1	2018-05-09	2018-05-23	1	1			som	7	14
83	2	1	UWI	ciproxin	2018-04-12	2018-04-18	1	2018-04-12	2018-04-26	1	1			som	6	14
8	2	1	UWI	ciproxin	2018-03-26	2018-04-09	1	2018-03-26	2018-04-16	0	1			pg	14	21
10	2	1	uwi	ciproxin	2018-03-14	2018-03-21	1	2019-03-14	2018-03-28	0	1			som	7	#NULL!
17	2	1	UWI	augmentin	2018-07-19	2018-07-29	1	2018-07-19	2018-08-05	0	1			som	10	17
24	2	1	UWI	ciproxin	2018-03-14	2018-03-24	1	2018-03-14	2018-03-28	0	1			som	10	14
26	2	1	UWI	augmentin	2018-06-07	2018-06-24	1	2018-06-07	2018-06-28	0	1			GP	17	21
27	2	1	UWI	ciproxin	2018-05-19	2018-05-26	1	2018-05-19	2018-06-02	0	1			som	7	14
35	2	1	UWI	ciproxin	2018-02-09	2018-02-16	1	2018-02-09	2018-02-23	0	1			pg	7	14
35	2	1	UWI	ciproxin	2018-02-09	2018-02-16	1	2018-02-09	2018-02-24	0	1			pg	7	15
38	2	1	UWI	ciproxin	2018-05-07	2018-05-14	1	2018-05-07	2018-05-21	0	1			pg	7	14
43	2	1	UWI	ciproxin	2018-01-29	2018-02-05	1	2018-01-29	2018-02-12	0	1			pg	7	14
47	2	1	UWI	ciproxin	2018-08-21	2018-08-31	1	2018-08-21	2018-09-07	0	1			som	10	17
55	2	1	UWI	augmentin	2018-02-01	2018-02-07	1	2018-02-01	2018-02-13	0	1			pg	6	12
58	2	1	UWI	ciproxin	2018-01-30	2018-02-08	1	2018-01-30	2018-02-15	0	1			som	9	16
59	2	1	UWI	ciproxin	2018-06-07	2018-06-14	1	2018-06-07	2018-06-21	0	1			som	7	14
59	2	1	UWI	ciproxin	2018-07-24	2018-07-31	1	2018-07-27	2018-08-07	0	1			som	7	11
62	2	1	UWI	augmentin	2018-01-18	2018-01-28	1	2018-01-18	2018-02-04	0	1			pg	10	17
72	2	1	UWI	ciproxin	2018-03-22	2018-03-29	1	2018-03-22	2018-04-05	0	1			gp	7	14
72	2	1	UWI	augmentin	2018-07-04	2018-07-11	1	2018-07-04	2018-07-20	0	1		0.515152	GP	7	16
81	2	1	UWI	ciproxin	2018-01-16	2018-01-26	1	2018-01-16	2018-02-02	0	1			gp	10	17
87	2	1	UWI	ciproxin	2018-01-04	2018-01-11	1	2018-01-04	2018-01-18	0	1			pg	7	14
89	2	1	UWI	ciproxin	2018-05-09	2018-05-16	1	2018-05-09	2018-05-23	0	1			som	7	14
85	2	1	tand/kaakinfectie	augmentin	2018-02-09	2018-02-16	1	2018-02-09	2018-02-24	0	1			som	7	15
90	2	1	pneunomie	augmentin	2018-04-04	2018-04-09	1	2018-04-04	2018-04-09	1	1			som	5	5
56	2	1	pneunomie	augmentin	2018-03-07	2018-03-14	1	2018-03-07	2018-03-21	0	1			som	7	14
86	2	1	pneunomie	augmentin	2018-03-07	2018-03-14	1	2018-03-07	2018-03-21	0	1			som	7	14
17	1	1	lwi	augmentin	2018-03-12	2018-03-19	1	2018-03-12	2018-03-26	1	1			som	7	14
20	1	1	lwi	augmentin	2018-02-13	2018-02-20	1	2018-02-13	2018-02-27	1	1			som	7	14
42	1	1	lwi	ciproxin	2018-01-30	2018-02-06	1	2018-01-30	2018-02-20	1	1			pg	7	21
51	1	1	lwi	augmentin	2018-02-01	2018-02-15	1	2018-02-01	2018-02-22	1	1			som	14	21
79	1	1	lwi	augmentin	2018-01-25	2018-02-02	1	2018-01-25	2018-02-09	1	1			pg	8	15
93	1	1	lwi	augmentin	2018-01-01	2018-01-08	1	2018-01-10	2018-01-24	1	1			som	7	14
5	1	1	lwi	augmentin	2018-07-10	2018-07-17	1	2018-07-10	2018-07-24	0	1			som	7	14
12	1	1	lwi	augmentin	2018-01-15	2018-01-22	1	2018-01-15	2018-01-29	0	1			pg	7	14
17	1	1	lwi	augmentin	2018-02-21	2018-02-28	1	2018-02-21	2018-03-07	0	1			som	7	14
22	1	1	lwi	augmentin	2018-04-04	2018-04-11	1	2018-04-04	2018-04-18	0	1			pg	7	14
30	1	1	lwi	augmentin	2018-01-19	2018-01-26	1	2018-01-19	2018-02-02	0	1			pg	7	14
33	1	1	lwi	augmentin	2018-05-04	2018-05-11	1	2018-05-04	2018-05-09	0	1			pg	7	5
39	1	1	lwi	augmentin	2018-04-16	2018-04-23	1	2018-04-16	2018-04-30	0	1			pg	7	14
54	1	1	lwi	augmentin	2018-04-15	2018-04-22	1	2018-04-15	2018-04-29	0	1			pg	7	14
68	1	1	lwi	augmentin	2018-07-10	2018-07-11	1	2018-07-10	2018-07-11	0	1			pg	1	1
69	1	1	lwi	augmentin	2018-03-01	2018-03-08	1	2018-03-05	2018-03-15	0	1			som	7	10
75	1	1	lwi	augmentin	2018-06-27	2018-07-04	1	2018-06-27	2018-07-11	0	1			pg	7	14
80	1	1	lwi	augmentin	2018-04-25	2018-05-02	1	2018-04-25	2018-05-09	0	1			pg	7	14
91	1	1	lwi	augmentin	2018-01-07	2018-01-14	1	2018-01-07	2018-01-25	0	1			som	7	18
24	2	1	LWI	augmentin	2018-01-22	2018-02-05	1	2018-01-22	2018-02-05	1	1			som	14	14
1	2	1	LWI	augmentin	2018-01-10	2018-01-19	1	2018-01-10	2018-01-25	0	1			gp	9	15
19	2	1	LWI	augmentin	2018-02-17	2018-02-24	1	2018-02-17	2018-03-03	0	1			pg	7	14
52	2	1	LWI	augmentin	2018-02-07	2018-02-12	1	2018-02-07	2018-02-22	0	1			pg	5	15
7	2	1	longonteking	augmentin	2018-06-27	2018-07-04	1	2018-06-27	2018-07-11	0	1			som	7	14
77	2	1	infectie wond voet	ciproxin	2018-05-15	2018-05-22	1	2018-05-15	2018-05-22	0	1			som	7	7
57	1	1	erysipelas	augmentin	2018-04-06	2018-04-16	1	2018-04-15	2018-04-23	0	1			pg	10	8
2	1	0	wondinfectie	augmentin	2017-07-26	2017-08-02	0			0	1			pg	7
5	1	0	uwi	ciproxin	2017-11-13	2017-11-27	0			1	1			som	14
44	1	0	uwi	ciproxin	2017-11-18	2017-11-21	0			1	1			pg	3
67	1	0	uwi	augmentin	2017-07-11	2017-07-19	0			1	1			som	8
80	1	0	uwi	ciproxin	2017-08-31	2017-09-10	0			1	1			pg	10
93	1	0	uwi	ciproxin	2017-09-22	2017-10-02	0			1	1			som	10
6	1	0	uwi	ciproxin	2017-10-17	2017-10-24	0			0	1			pg	7
15	1	0	uwi	ciproxin	2017-09-21	2017-09-29	0			0	1			som	8
15	1	0	uwi	ciproxin	2017-05-03	2017-05-11	0			0	1			som	8
39	1	0	uwi	ciproxin	2017-11-08	2017-11-15	0			0	1			pg	7
42	1	0	uwi	ciproxin	2017-01-03	2017-01-17	0			0	1			pg	14
45	1	0	uwi	ciproxin	2017-11-30	2017-12-12	0			0	1			pg	12
46	1	0	uwi	augmentin	2017-10-27	2017-11-03	0			0	1			pg	7
48	1	0	uwi	ciproxin	2017-10-30	2017-11-06	0			0	1			pg	7
49	1	0	uwi	augmentin	2017-04-07	2017-04-14	0			0	1			som	7
49	1	0	uwi	ciproxin	2017-08-27	2017-09-03	0			0	1			som	7
64	1	0	uwi	ciproxin	2017-01-14	2017-01-30	0			0	1			pg	16
67	1	0	uwi	ciproxin	2017-07-22	2017-07-30	0			0	1			som	8
74	1	0	uwi	ciproxin	2017-06-08	2017-06-15	0			0	1			pg	7
21	2	0	uwi	ciproxin	2016-09-29	2016-10-20	0			1	1			som	21
21	2	0	UWI	ciproxin	2016-09-29	2016-10-02	0			1	1			som	3
24	2	0	UWI	ciproxin	2017-06-05	2017-06-15	0			1	1			som	10
43	2	0	UWI	ciproxin	2017-12-23	2017-12-30	0			1	1			pg	7
43	2	0	UWI	augmentin	2017-01-30	2017-02-09	0			1	1			pg	10
50	2	0	UWI	ciproxin	2017-07-31	2017-08-07	0			1	1			som	7
87	2	0	uwi	ciproxin	2017-03-12	2017-03-19	0			1	1			pg	7
87	2	0	UWI	augmentin	2016-02-08	2016-02-15	0			1	1			pg	7
87	2	0	UWI	ciproxin	2016-01-28	2016-02-07	0			1	1			pg	10
1	2	0	UWI	augmentin	2017-04-18	2017-04-28	0			0	1			gp	10
9	2	0	uwi	augmentin	2015-08-31	2015-09-03	0			0	1			som	3
11	2	0	UWI	ciproxin	2017-08-18	2017-09-01	0			0	1			pg	14
24	2	0	UWI	ciproxin	2016-12-09	2016-12-16	0			0	1			gp	7
34	2	0	UWI	ciproxin	2017-07-28	2017-08-06	0			0	1			som	9
35	2	0	UWI	ciproxin	2017-10-31	2017-11-07	0			0	1			pg	7
43	2	0	UWI	ciproxin	2017-12-01	2017-12-08	0			0	1			pg	7
43	2	0	UWI	ciproxin	2017-10-23	2017-11-06	0			0	1			pg	14
43	2	0	UWI	ciproxin	2017-08-18	2017-08-26	0			0	1			pg	8
43	2	0	UWI	ciproxin	2017-07-26	2017-08-05	0			0	1			pg	10
43	2	0	UWI	ciproxin	2017-04-24	2017-05-04	0			0	1			pg	10
43	2	0	UWI	ciproxin	2017-04-06	2017-04-13	0			0	1			pg	7
47	2	0	UWI	ciproxin	2017-02-22	2017-03-04	0			0	1			som	10
52	2	0	UWI	ciproxin	2017-11-13	2017-11-23	0			0	1			pg	10
84	2	0	UWI	augmentin	2017-02-11	2017-02-17	0			0	1			som	6
87	2	0	UWI	ciproxin	2017-08-14	2017-08-21	0			0	1			pg	7
87	2	0	UWI	ciproxin	2017-04-14	2017-04-21	0			0	1			pg	7
87	2	0	UWI	ciproxin	2016-07-22	2016-08-06	0			0	1			pg	15
4	1	0	otitis externa	augmentin	2017-03-07	2017-03-15	0			0	1			pg	8
28	1	0	ontstoken wond	augmentin	2017-08-11	2017-08-21	0			1	1			som	10
39	1	0	lwi	augmentin	2017-06-20	2017-06-28	0			1	1			pg	8
53	1	0	lwi	augmentin	2017-01-18	2017-01-25	0			1	1			pg	7
54	1	0	lwi	augmentin	2017-01-27	2017-02-04	0			1	1			pg	8
65	1	0	lwi	augmentin	2017-08-31	2017-09-08	0			1	1			som	8
78	1	0	lwi	augmentin	2017-04-25	2017-05-03	0			1	1			som	8
2	1	0	lwi	augmentin	2017-12-20	2017-12-27	0			0	1			pg	7
6	1	0	lwi	augmentin	2017-05-26	2017-06-02	0			0	1			pg	7
33	1	0	lwi	augmentin	2017-08-26	2017-09-02	0			0	1			pg	7
73	1	0	lwi	augmentin	2017-01-06	2017-01-13	0			0	1			pg	7
75	1	0	lwi	augmentin	2017-07-25	2017-08-01	0			0	1			pg	7
76	1	0	lwi	augmentin	2017-07-18	2017-07-25	0			0	1			som	7
76	1	0	lwi	augmentin	2017-09-13	2017-09-20	0			0	1			som	7
80	1	0	lwi	augmentin	2017-02-24	2017-03-03	0			0	1			pg	7
88	1	0	lwi	augmentin	2017-08-29	2017-09-01	0			0	1			pg	3
7	2	0	LWI	augmentin	2017-03-10	2017-03-17	0			1	1			som	7
21	2	0	LWI	augmentin	2017-02-09	2017-02-14	0			1	1			som	5
21	2	0	LWI	ciproxin	2017-02-09	2017-02-12	0			1	1			som	3
56	2	0	LWI	augmentin	2017-10-02	2017-10-10	0			1	1			som	8
66	2	0	LWI	augmentin	2017-02-02	2017-02-09	0			1	1			pg	7
89	2	0	lwi	augmentin	2017-02-19	2017-02-28	0			1	1			som	9
1	2	0	LWI	augmentin	2017-07-14	2017-07-24	0			0	1			gp	10
7	2	0	LWI	augmentin	2017-10-23	2017-10-30	0			0	1			som	7
27	2	0	LWI	augmentin	2017-07-11	2017-07-21	0			0	1			som	10
47	2	0	lwi	augmentin	2016-03-29	2016-04-05	0			0	1			som	7
4	1	0	huidinfectie	augmentin	2017-06-21	2017-07-02	0			0	1			pg	11
91	1	0	huidinfectie	augmentin	2017-08-22	2017-08-29	0			0	1			som	7
7	2	0	huidinfectie	augmentin	2017-11-12	2017-11-19	0			1	1			som	7
25	2	0	huidinfectie	ciproxin	2017-03-07	2017-03-21	0			1	1			som	14
11	2	0	huidinfectie	augmentin	2016-01-05	2016-01-15	0			0	1			pg	10
25	2	0	huidinfectie	augmentin	2017-10-04	2017-10-15	0			0	1			som	11
27	2	0	huidinfectie	augmentin	2017-02-07	2017-02-11	0			0	1			som	4
77	2	0	huidinfectie	augmentin	2017-04-10	2017-04-18	0			0	1			som	8
40	1	0	darmperforatie	augmentin	2017-12-24	2018-01-02	0			1	1			som	9
40	1	0	darmperforatie	augmentin	2017-10-02	2017-10-09	0			0	1			som	7
48	1	0	cellulitis	augmentin	2017-06-30	2017-07-07	0			1	1			pg	7
